# Supplementary material for: SLC35G3 is a UDP-N-acetylglucosamine transporter for sperm glycoprotein formation and underpins male fertility in mice
Source: eLife journal article supplement (doi:10.7554/elife.107494), 2025-07-21

A

SPACA1

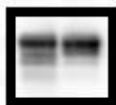

ZPBP1

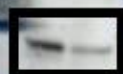

GOPC

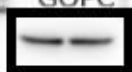

BASIGIN

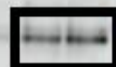

**B**

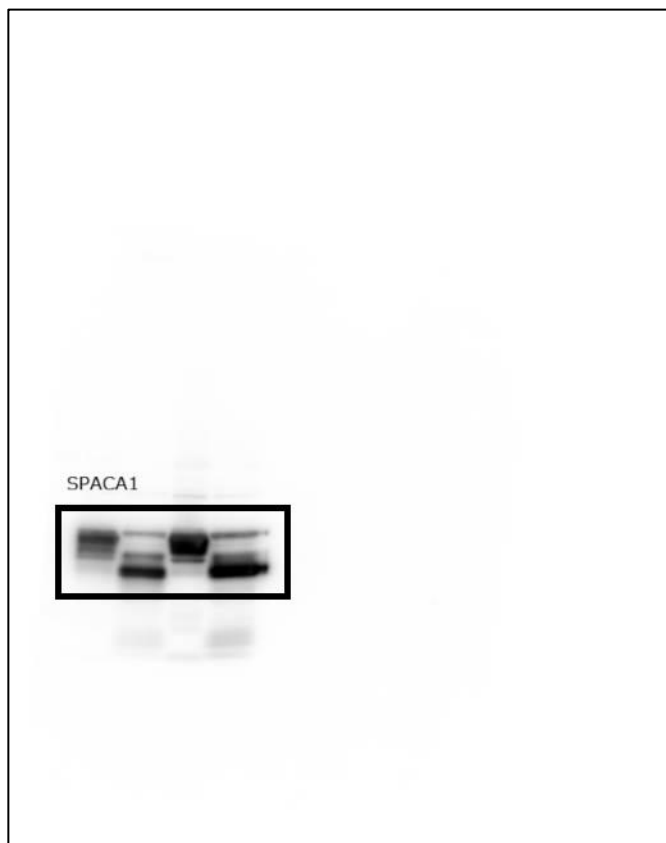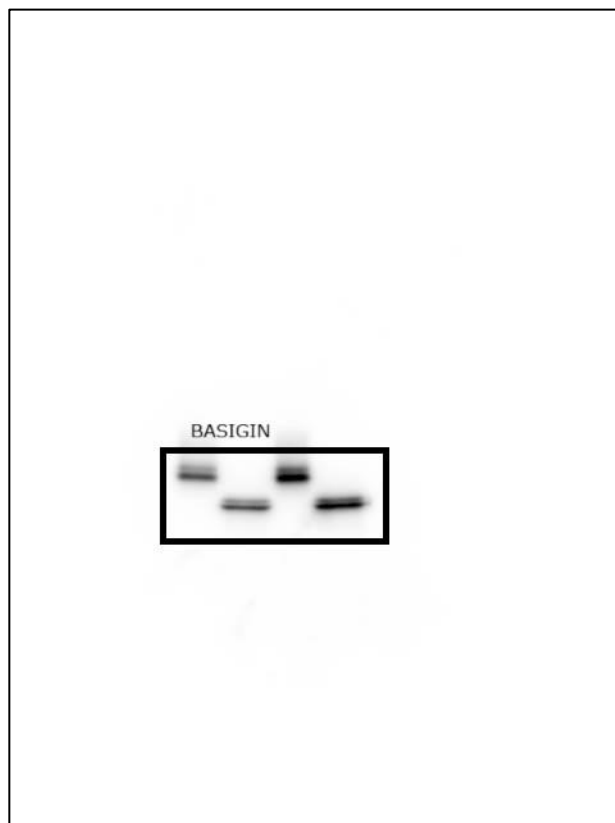

C

SPACA1

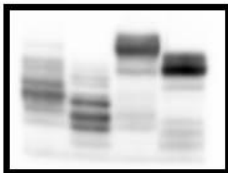

Bas

BASIGIN

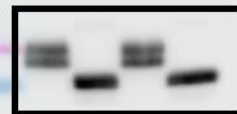

D

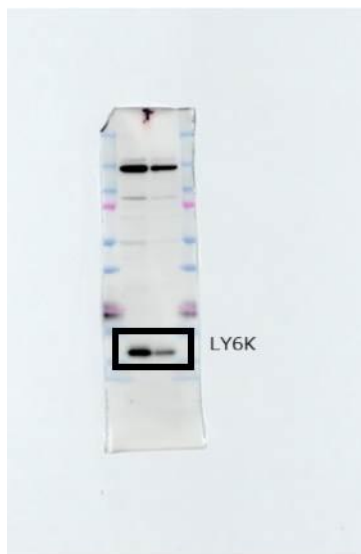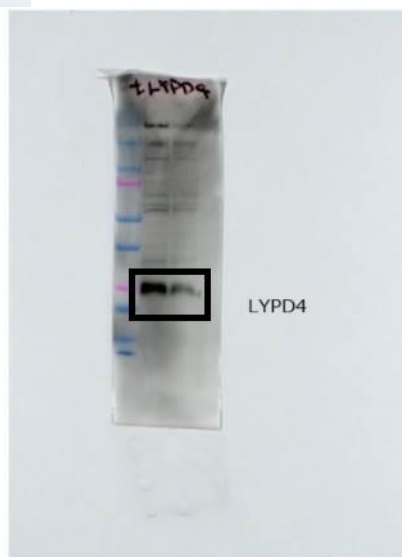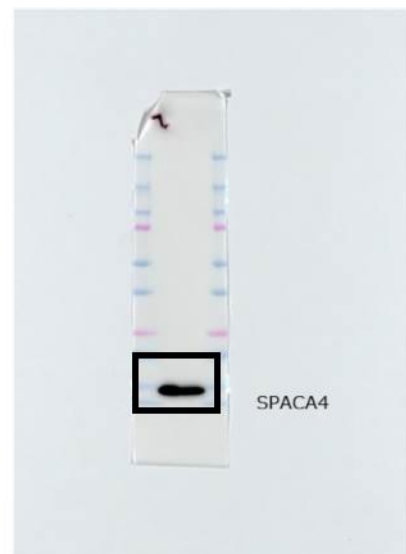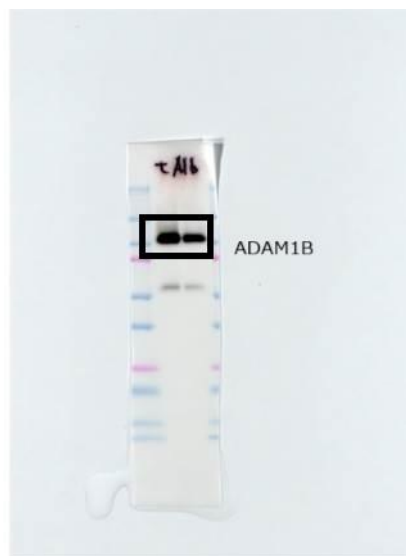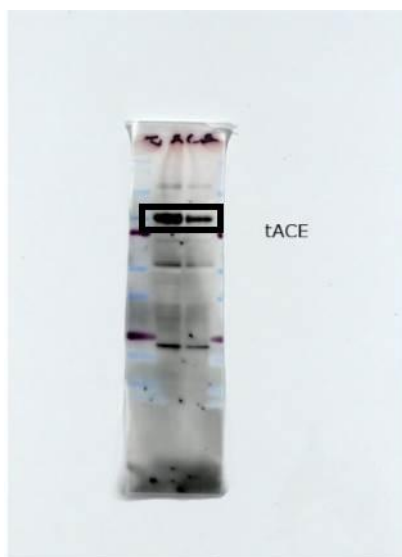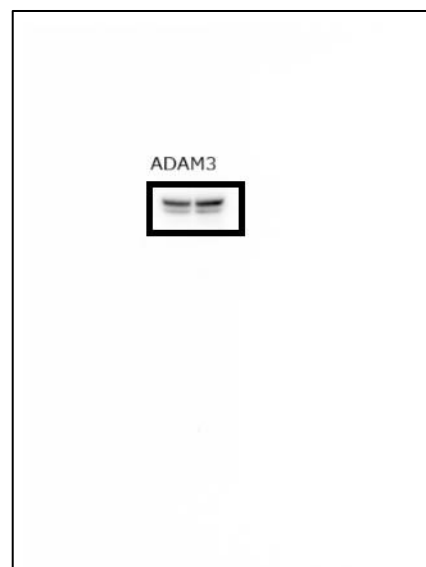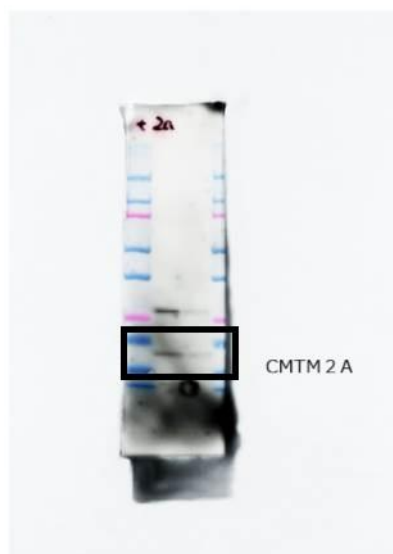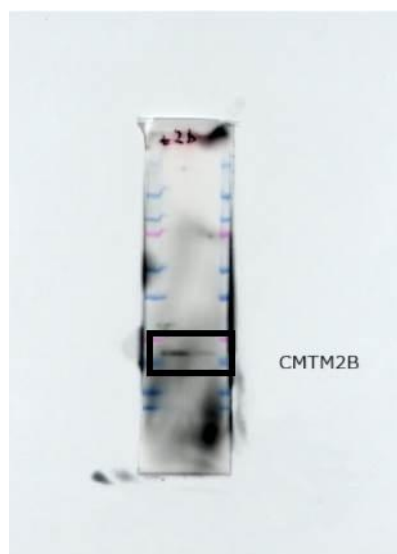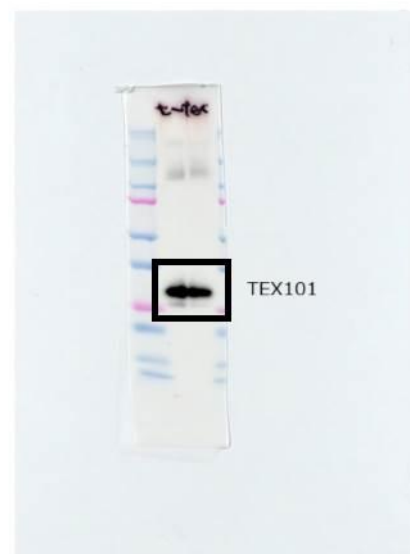

D

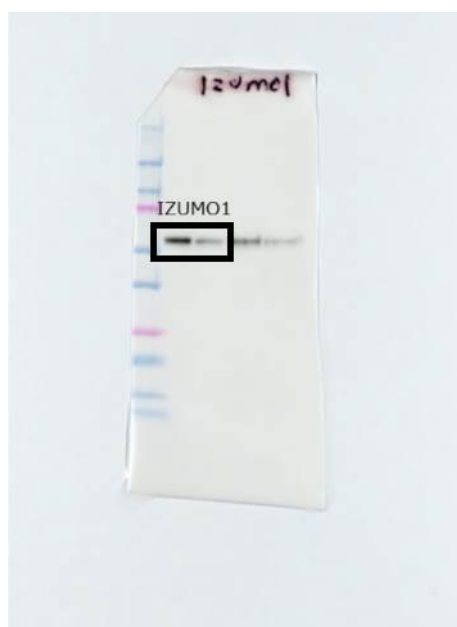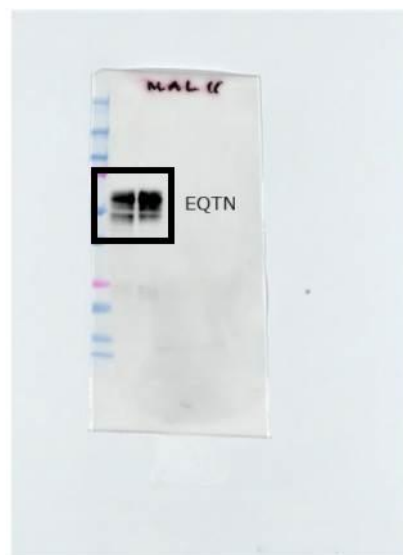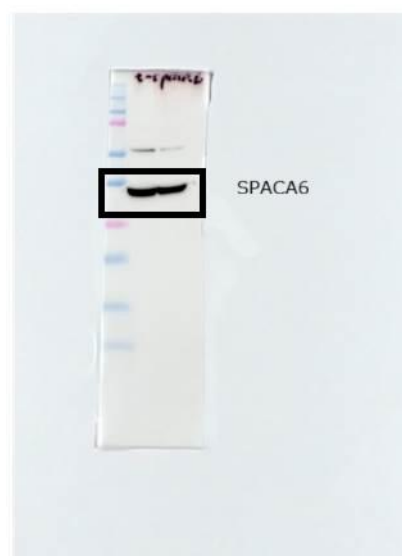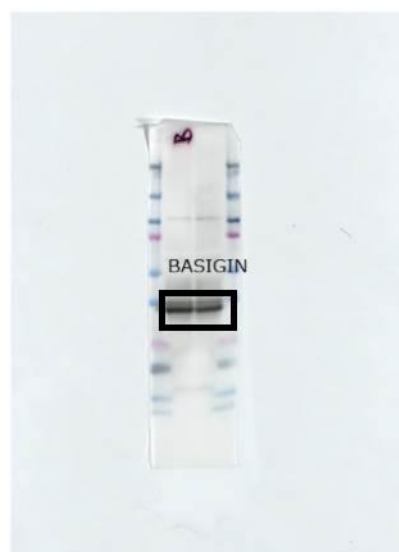

E

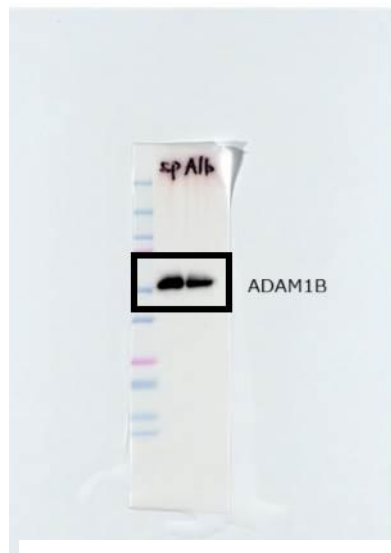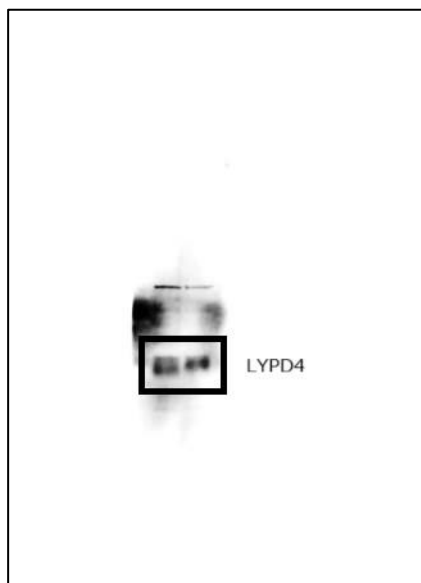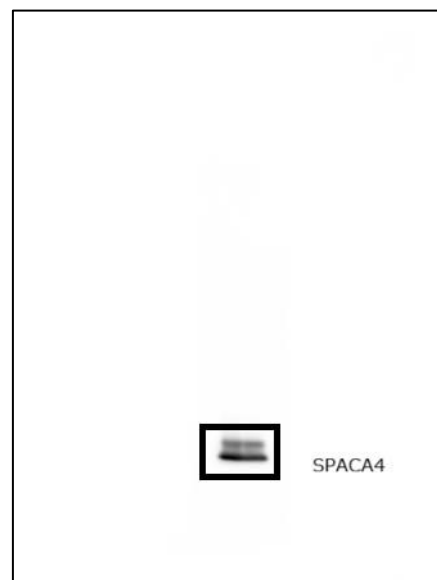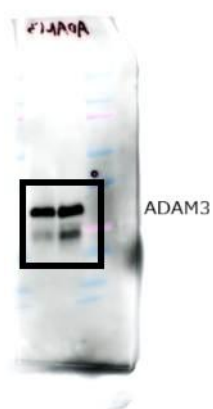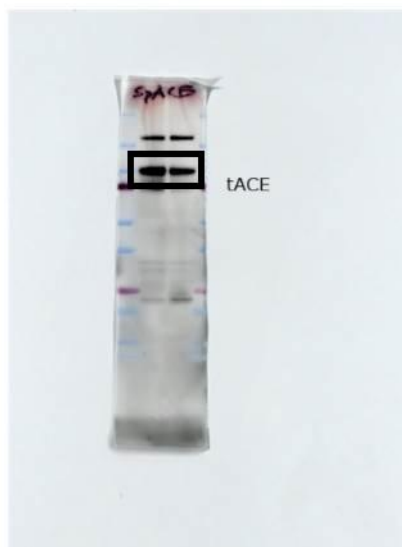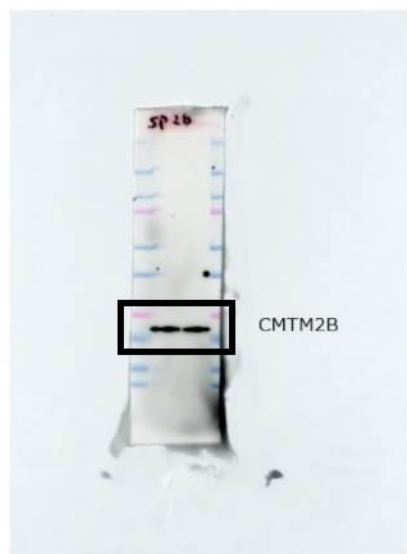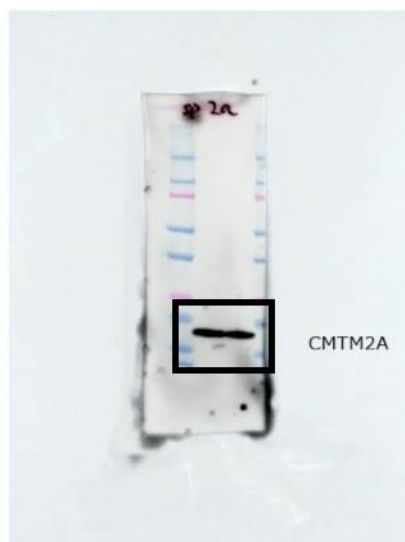

E

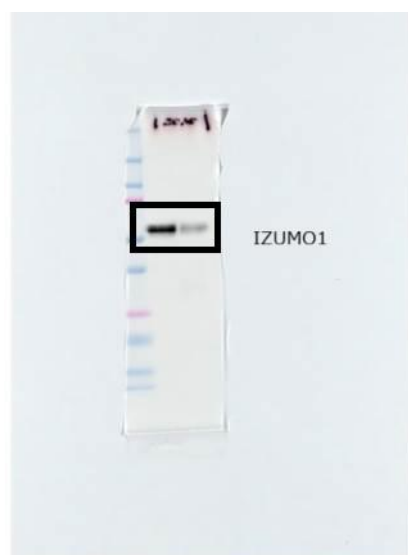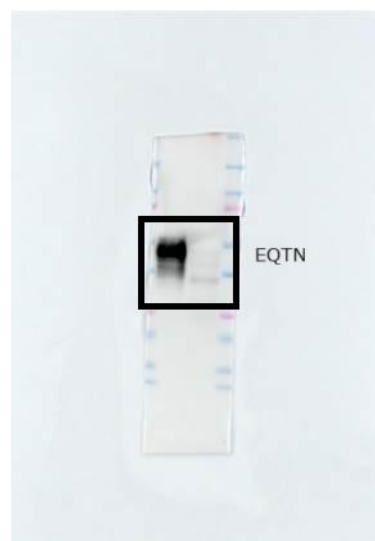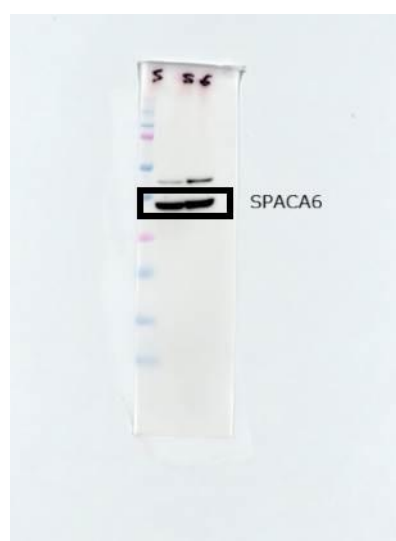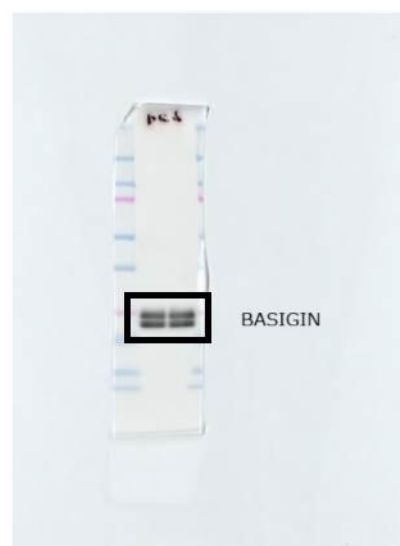

Supplement: fig6-data1 [file elife-107494-fig6-data1-v1.pdf]
