# Supplementary material for: SLC35G3 is a UDP-N-acetylglucosamine transporter for sperm glycoprotein formation and underpins male fertility in mice
Source: eLife journal article supplement (doi:10.7554/elife.107494), 2025-07-21

A

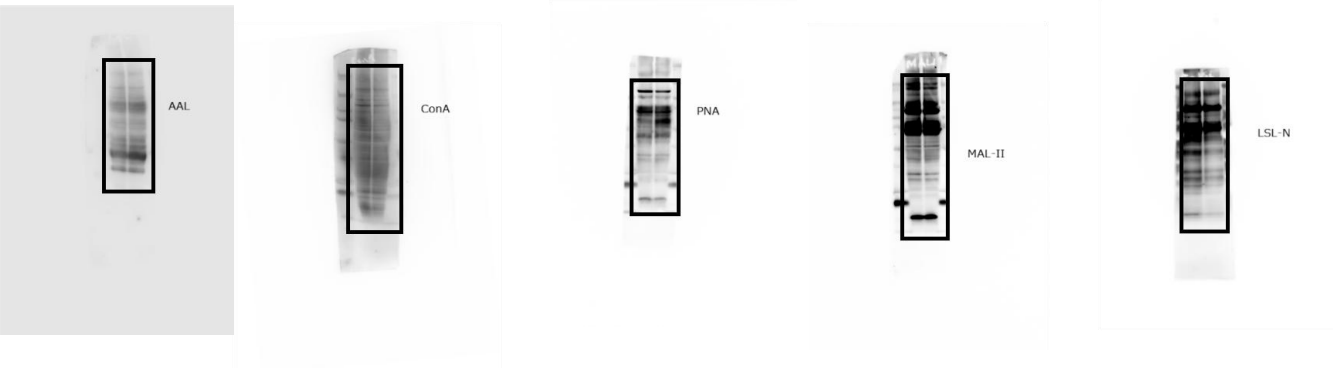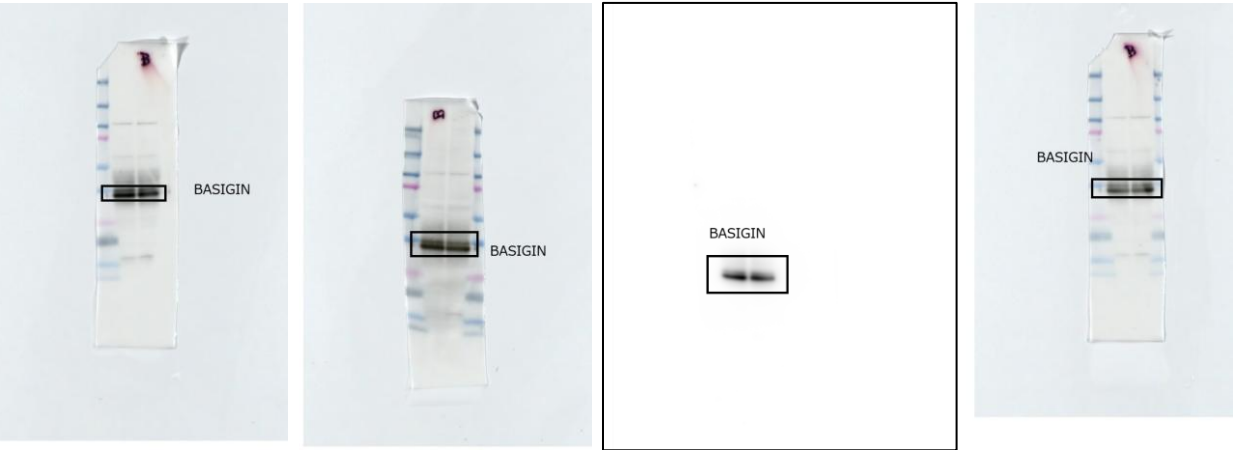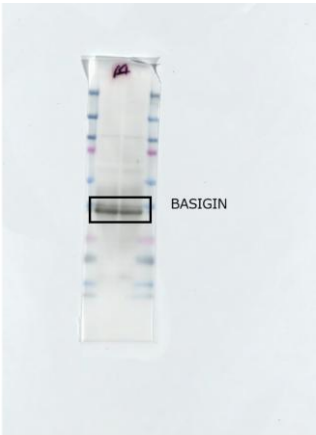

B

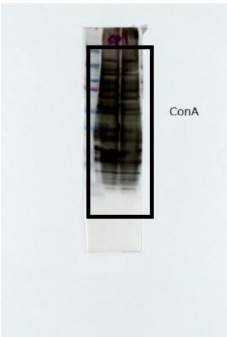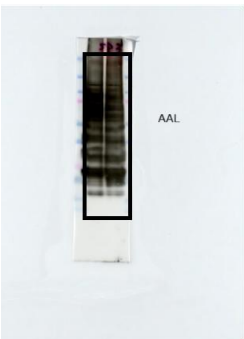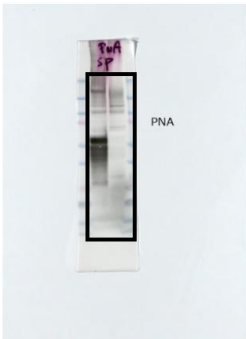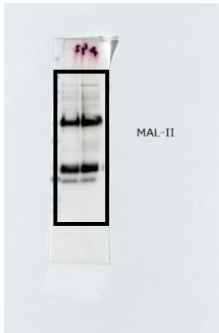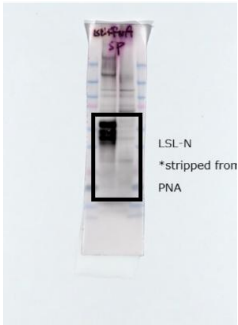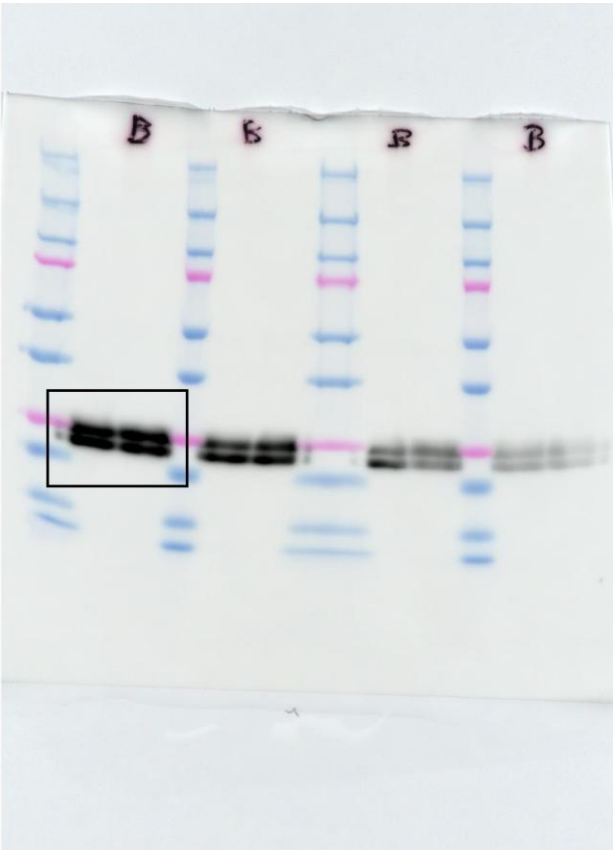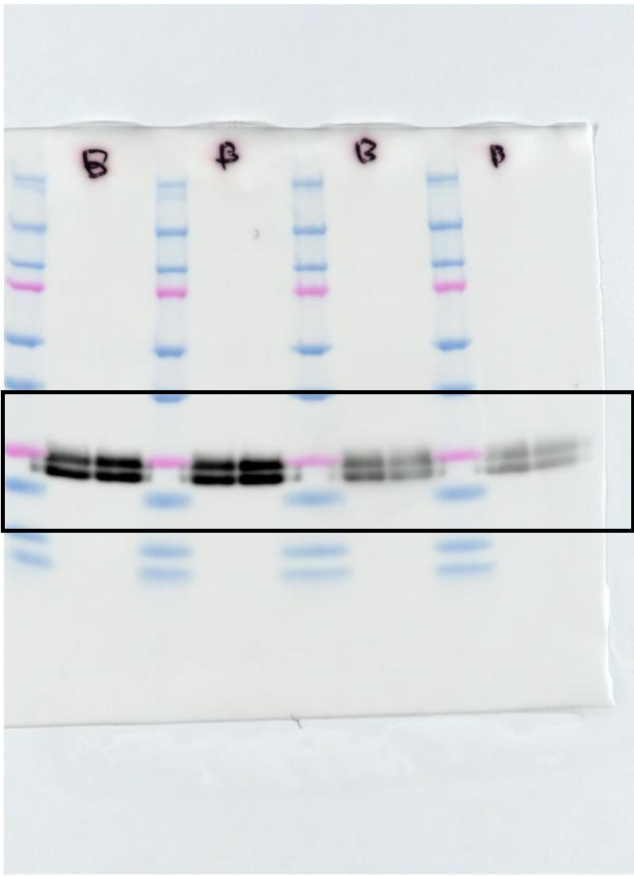

C

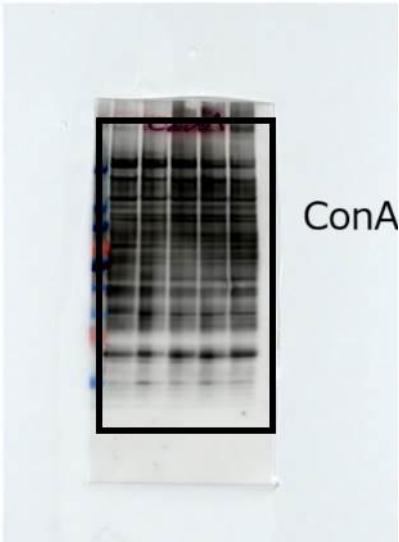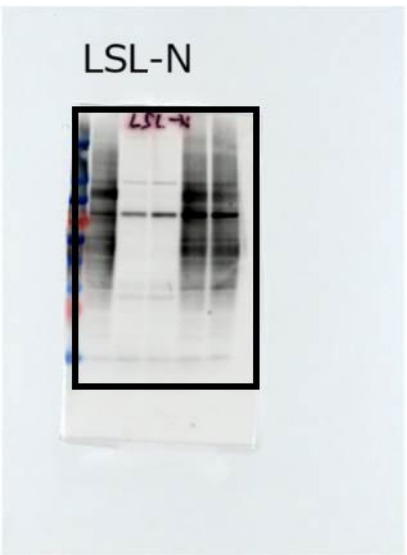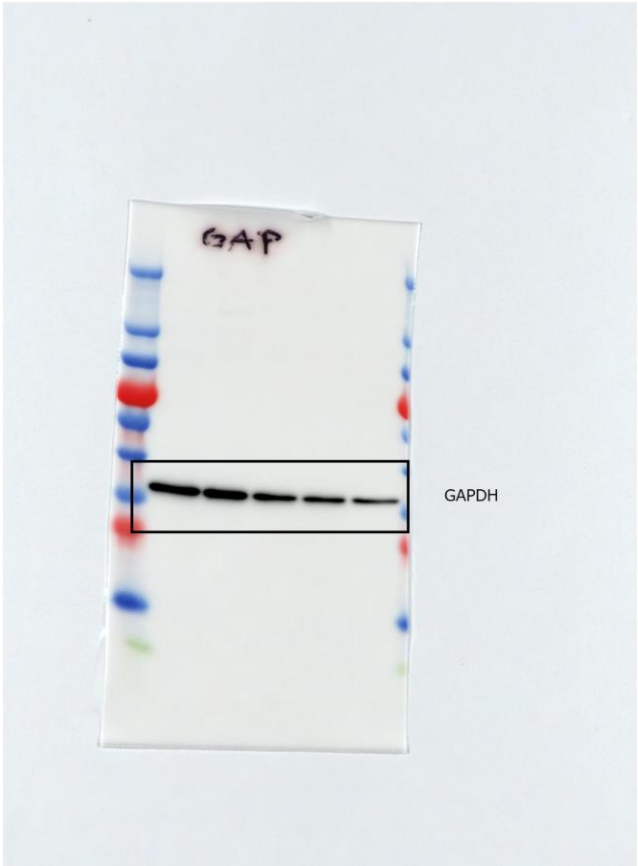

D

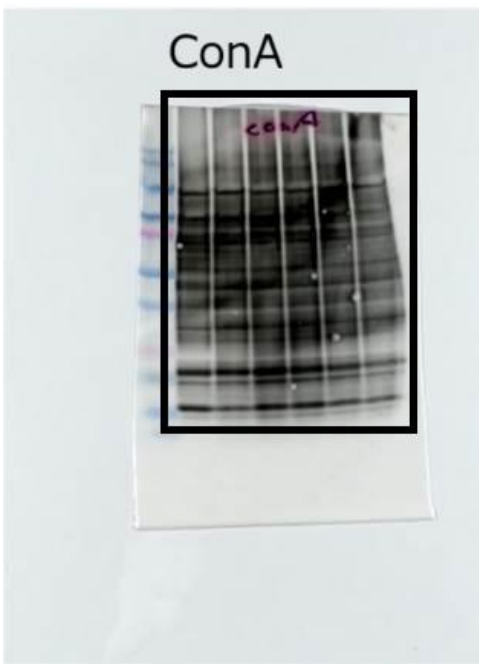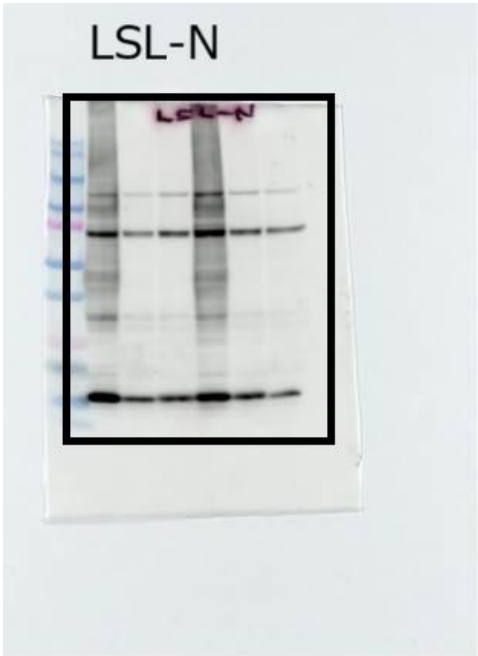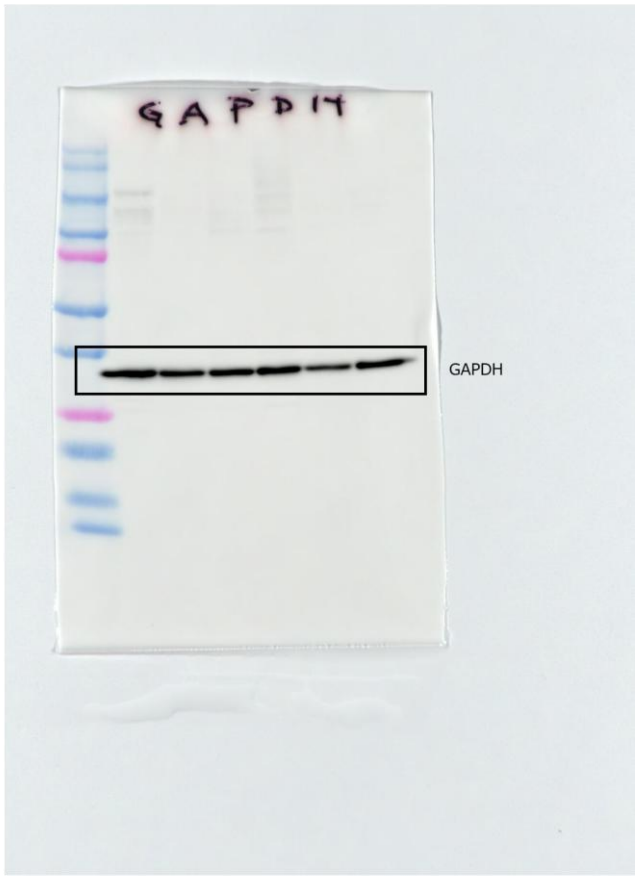

Supplement: fig7-data1 [file elife-107494-fig7-data1-v1.pdf]
