# Supplementary figures and images for: SLC35G3 is a UDP-N-acetylglucosamine transporter for sperm glycoprotein formation and underpins male fertility in mice
Source: eLife journal article supplement (doi:10.7554/elife.107494), 2025-07-21

mCherry

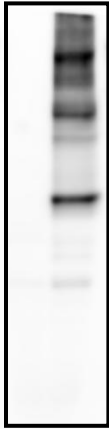

BASIGIN

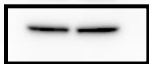

Supplement: fig1-figsupp2-data1 [file Figure1-figuresupplement2-sourcedata1.pdf › Figure1-figuresupplement2-sourcedata1.pdf]
